# Supplementary material for: Uncovering the biosynthetic potential of rare metagenomic DNA using co-occurrence network analysis of targeted sequences
Source: PubMed Central journal article supplement (PMC6710260; doi:10.1038/s41467-019-11658-z), 2019-08-26
Supplement: 41467_2019_11658_MOESM1_ESM.pdf [file 41467_2019_11658_MOESM1_ESM.pdf]

## Supplemental Information for:

**Title:** Uncovering the biosynthetic potential of rare metagenomic DNA using co-occurrence network analysis of targeted sequences

**Authors:** Vincent Libis<sup>1</sup>, Niv Antonovsky<sup>1</sup>, Mengyin Zhang, Zhuo Shang, Daniel Montiel, Jeffrey Maniko, Melinda A. Ternei, Paula Y. Calle, Christophe Lemetre, Jeremy G. Owen and Sean F. Brady\*

**Author affiliation:**

Laboratory of Genetically Encoded Small Molecules, The Rockefeller University, 1230 York Avenue, New York, NY 10065.

<sup>1</sup> These authors contributed equally to this work.

**\*Corresponding Author:** Sean F. Brady

**Contact:** Laboratory of Genetically Encoded Small Molecules  
The Rockefeller University  
1230 York Avenue  
New York, NY 10065

**Phone:** 212-327-8280

**Fax:** 212-327-8281

**Email:** [sbrady@rockefeller.edu](mailto:sbrady@rockefeller.edu)

**Supplementary Table 1: Soil samples and metagenomic libraries information**

| Library name | subpools | clones per subpool | library clones | avg. insert size [kbp] | total library size [Gbp] | amplicon sequencing [M reads] |                    |                |      |                  |
|--------------|----------|--------------------|----------------|------------------------|--------------------------|-------------------------------|--------------------|----------------|------|------------------|
|              |          |                    |                |                        |                          | adenylation (NRPS)            | ketosynthase (PKS) | enduracididine | AHBA | capreomycinidine |
| Arizona      | 2304     | 5000               | 1E+07          | 40                     | 400                      | 24                            | 11*                | 0.2            | 0.1  | 15               |
| Oregon       | 768      | 25000              | 2E+07          | 40                     | 800                      | 11                            | 10                 | 0.2            | N/A  | N/A              |
| New Mexico   | 768      | 25000              | 2E+07          | 40                     | 800                      | 12                            | 11                 | N/A            | 0.05 | N/A              |
| Hawaii       | 768      | 25000              | 2E+07          | 40                     | 800                      | 11                            | N/A                | N/A            | N/A  | N/A              |

\*Due to low sequencing coverage of one 384 plate, only 1920 subpools were processed for Arizona ketosynthase domains

**Supplementary Table 2: Primers table**

| Target domain                            | Annealing T° | Forward binding sequence   | Reverse binding sequence    | Primer <sub>len</sub> / Total <sub>len</sub> |
|------------------------------------------|--------------|----------------------------|-----------------------------|----------------------------------------------|
| AD1 (Arizona)                            | 65           | 5'-GCSTACSYSATSTACACSTCSGG | 5'-SASGTCVCCSGTSCGGTA       | 23 / 210                                     |
| AD2 (Oregon, Hawaii, New Mexico)         | 56.3         | 5'-SATBTAYACSTCVGGHWCSAC   | 5'-CCANRTCNCBGTSYKGTACA     | 21 / 210                                     |
| KS (Arizona, Oregon, Hawaii, New Mexico) | 56.3         | 5'-GCNATGGAYCCNCARCARMGNVT | 5'-GTNCNNGTNCRCRTGNSCYTCNAC | 23 / 210                                     |
| END. (Arizona, Oregon)                   | 64.5         | 5'-CCNCCRCCSTGGCACTTCKCSG  | 5'-CSAACTGCTTGGGCATSCCCTG   | 22 / 110                                     |
| AHBA (Arizona, New Mexico)               | 61           | 5'-CAGAACGGCAAGCTGATGACSG  | 5'-GGAMCATSGCCATGTAGYKSG    | 22 / 110                                     |
| CAP. (Arizona)                           | 55           | 5'-SGACRTSWSCWSSWSCGGYGT   | 5'-CRSTNGGRTRTGSGGRAAGT     | 21 / 210                                     |

**Supplementary Table 3: BGCs similarity analysis of 60 metagenomic clones**

| Recovered BGC #         | Highest median identity to a reference BGC (%) | BiG-SCAPE Raw distance | Closest relative (BiG-SCAPE)           | Source organism                             |
|-------------------------|------------------------------------------------|------------------------|----------------------------------------|---------------------------------------------|
| 29:Genbank MN161611     | 95.6                                           | 0.36                   | GCF_001886595_NZ_CP018074.1.cluster027 | <i>Streptomyces venezuelae</i> NRRL B-65442 |
| 9:Genbank MN161603      | 95.6                                           | 0.36                   | GCF_000023245_NC_013093.1.cluster022   | <i>Actinosynnema mirum</i> DSM 43827        |
| 28:Genbank MN161610     | 83.5                                           | 0.43                   | GCF_001302585_NZ_CP012752.1.cluster008 | <i>Kibdelosporangium phytohabitans</i>      |
| 38:Genbank MN161613     | 79.7                                           | 0.43                   | GCF_001579845_NZ_CP007440.1.cluster002 | <i>Rhodoplanes</i> sp. Z2-YC6860            |
| 25:Genbank MN161608     | 89.8                                           | 0.43                   | GCF_001443625_NZ_CP013129.1.cluster026 | <i>Streptomyces venezuelae</i>              |
| 73:Genbank MN161622     | 89.7                                           | 0.44                   | GCF_002796545_NZ_CP024894.1.cluster009 | <i>Amycolatopsis</i> sp. AA4                |
| 355:Genbank MN161648    | 94.2                                           | 0.45                   | GCF_000282715_NC_018266.1.cluster017   | <i>Amycolatopsis mediterranei</i> S699      |
| 46:Genbank MN161620     | 89.8                                           | 0.45                   | GCF_001302585_NZ_CP012752.1.cluster017 | <i>Kibdelosporangium phytohabitans</i>      |
| 900:Genbank MN161659    | 88.4                                           | 0.47                   | GCF_000282715_NC_018266.1.cluster017   | <i>Amycolatopsis mediterranei</i> S699      |
| 16:Genbank MN161605     | 92.7                                           | 0.48                   | GCF_000739085_NZ_CP009110.1.cluster003 | <i>Amycolatopsis methanolica</i> 239        |
| 41:Genbank MN161615     | 97.1                                           | 0.49                   | GCF_001650215_NZ_CP015726.1.cluster030 | <i>Streptomyces</i> sp. RTd22               |
| 40:Genbank MN161614     | 85.5                                           | >0.5                   | NA                                     | NA                                          |
| 47:Genbank MN161621     | 84                                             | >0.5                   | NA                                     | NA                                          |
| 96:Genbank MN161625     | 76.8                                           | >0.5                   | NA                                     | NA                                          |
| 683:Genbank MN161657    | 75.7                                           | >0.5                   | NA                                     | NA                                          |
| 917:Genbank MN161660    | 75.3                                           | >0.5                   | NA                                     | NA                                          |
| All remaining BGCs (44) | <75                                            | >0.5                   | NA                                     | NA                                          |

**Supplementary Table 4: Omnipeptin biosynthetic gene analysis**

| Gene         | Proposed function          | NCBI similarity                                                                    | Species                                  | %ID |
|--------------|----------------------------|------------------------------------------------------------------------------------|------------------------------------------|-----|
| <i>omn1</i>  |                            | flavin reductase                                                                   | <i>Kibdelosporangium sp. MJ126-NF4</i>   | 71  |
| <i>omn2</i>  |                            | cation/H(+) antiporter                                                             | <i>Amycolatopsis antarctica</i>          | 45  |
| <i>omn3</i>  | Halogenation of tryptophan | tryptophan 7-halogenase                                                            | <i>Streptomyces sp. NRRL S-146</i>       | 76  |
| <i>omn4</i>  | fatty acyl-AMP ligase      | fatty acyl-AMP ligase                                                              | <i>Streptomyces formicae</i>             | 65  |
| <i>omn5</i>  | Attachment of acyl chain   | acyl carrier protein                                                               | <i>Streptomyces caeruleatus</i>          | 49  |
| <i>omn6</i>  | NRPS                       | non-ribosomal peptide synthetase                                                   | <i>Sciscionella sp. SE31</i>             | 53  |
| <i>omn7</i>  | NRPS                       | non-ribosomal peptide synthetase                                                   | <i>Actinoplanes friuliensis</i>          | 50  |
| <i>omn8</i>  | NRPS                       | non-ribosomal peptide synthetase                                                   | <i>Streptomyces sp. LUP47B</i>           | 57  |
| <i>omn9</i>  |                            | protein mbtH                                                                       | <i>Saccharomonospora viridis</i>         | 68  |
| <i>omn10</i> | Deacylation                | Cyclic lipopeptide acylase                                                         | <i>Streptomyces canus</i>                | 55  |
| <i>omn11</i> |                            | alpha/beta hydrolase                                                               | <i>Streptomyces sp. M1013</i>            | 67  |
| <i>omn12</i> |                            | hypothetical protein                                                               | <i>Streptomyces sp. LUP47B</i>           | 61  |
| <i>omn13</i> |                            | hypothetical protein                                                               | <i>Sciscionella sp. SE31</i>             | 38  |
| <i>omn14</i> | Transport                  | ABC transporter permease                                                           | <i>Herbihabitans rhizosphaerae</i>       | 66  |
| <i>omn15</i> | Transport                  | daunorubicin resistance protein DrrA family<br>ABC transporter ATP-binding protein | <i>Saccharothrix espanaensis</i>         | 65  |
| <i>omn16</i> |                            | glutamate synthase                                                                 | <i>Amycolatopsis mediterranei</i>        | 70  |
| <i>omn17</i> |                            | asparagine ligase                                                                  | <i>Saccharothrix syringae</i>            | 75  |
| <i>omn18</i> |                            | methylaspartate mutase E                                                           | <i>Streptomyces pratensis ATCC 33331</i> | 64  |
| <i>omn19</i> |                            | methylaspartate mutase S                                                           | <i>Streptomyces erythrochromogenes</i>   | 59  |
| <i>omn20</i> | Regulation                 | ArsR family transcriptional regulator                                              | <i>Actinoplanes utahensis</i>            | 43  |
| <i>omn21</i> |                            | hypothetical protein                                                               | <i>Streptomyces canus</i>                | 62  |
| <i>omn22</i> | Transport                  | ABC transporter permease                                                           | <i>Streptomyces sp. LUP47B</i>           | 59  |
| <i>omn23</i> | Transport                  | ABC transporter ATP-binding protein                                                | <i>Streptomyces sp. LUP47B</i>           | 76  |
| <i>omn24</i> | Regulation                 | signal transduction histidine kinase                                               | <i>Actinokineospora cianjurenensis</i>   | 60  |
| <i>omn25</i> | Regulation                 | response regulator transcription factor                                            | <i>Actinokineospora cianjurenensis</i>   | 80  |
| <i>omn26</i> | Hydroxylation of tyrosine  | cytochrome P450                                                                    | <i>Streptomyces sp. NRRL B-24051</i>     | 64  |
| <i>omn27</i> | Hydroxylation of proline   | proline hydroxylase                                                                | <i>Streptomyces malaysiensis</i>         | 53  |
| <i>omn28</i> |                            | phytanoyl-CoA dioxygenase                                                          | <i>Streptomyces sp. H23</i>              | 66  |
| <i>omn29</i> |                            | alcohol dehydrogenase                                                              | <i>Streptomyces sp. LUP47B</i>           | 73  |
| <i>omn30</i> |                            | myo-inositol-1-phosphate synthase                                                  | <i>Kibdelosporangium aridum</i>          | 64  |
| <i>omn31</i> |                            | 4-hydroxybenzoate polyprenyltransferase                                            | <i>Actinocrispum wychmicini</i>          | 57  |
| <i>omn32</i> |                            | sugar phosphate isomerase/epimerase                                                | <i>Actinosynnema sp. ALI-1.44</i>        | 70  |
| <i>omn33</i> |                            | TatD family hydrolase                                                              | <i>Amycolatopsis nigrescens</i>          | 79  |
| <i>omn34</i> |                            | xylose isomerase                                                                   | <i>Kibdelosporangium aridum</i>          | 67  |
| <i>omn35</i> |                            | alkaline phosphatase family protein                                                | <i>Prauserella shujinwangii</i>          | 72  |
| <i>omn36</i> | Regulation                 | AfsR/SARP family transcriptional regulator                                         | <i>Kibdelosporangium phytohabitans</i>   | 60  |
| <i>omn37</i> | Regulation                 | TetR family transcriptional regulator                                              | <i>Actinophytocola oryzae</i>            | 47  |
| <i>omn38</i> | Regulation                 | TetR/AcrR family transcriptional regulator                                         | <i>Kibdelosporangium aridum</i>          | 66  |
| <i>omn39</i> |                            | gamma-butyrolactone biosynthesis protein                                           | <i>Streptomyces sp. RP5T</i>             | 49  |
| <i>omn40</i> |                            | NAD-dependent epimerase/dehydratase family<br>protein                              | <i>Herbihabitans rhizosphaerae</i>       | 56  |

**Supplementary Table 5.**  $^1\text{H}$  and  $^{13}\text{C}$  NMR (600 MHz, DMSO- $d_6$ ) data for omnipeptin (1)

| Residue  | Pos.                | $\delta_c$            | $\delta_H$ , mult. (J in Hz)*       | Residue    | Pos.                | $\delta_c$            | $\delta_H$ , mult. (J in Hz)* |
|----------|---------------------|-----------------------|-------------------------------------|------------|---------------------|-----------------------|-------------------------------|
| isoAsp-1 | 1                   | 170.9, C              | -                                   |            | 5-CONH <sub>2</sub> | -                     | 6.90, brs; 7.32               |
|          | 2                   | 50.9, CH              | 3.57                                |            | 2-NH                | -                     | 7.87, br s                    |
|          | 3                   | 36.4, CH <sub>2</sub> | 2.19, 2.75                          | Cl-Trp-8   | 1                   | 170.7, C              | -                             |
| 4-CONH   | 169.1, C            | -                     | 2                                   |            | 53.4, CH            | 4.55                  |                               |
| hyTyr-2  | 1                   | 170.4, C              | -                                   |            | 3                   | 27.7, CH <sub>2</sub> | 2.85, 3.13                    |
|          | 2                   | 59.9, CH              | 4.28, d (7.4)                       |            | 4                   | 110.3, C              | -                             |
|          | 3                   | 72.4, CH              | 4.66, d (7.4)                       |            | 4a                  | 126.0, C              | -                             |
|          | 4                   | 132.1, C              | -                                   |            | 5                   | 119.8, C              | 7.58, d (8.4)                 |
|          | 5/9                 | 128.0, CH             | 7.22                                |            | 6                   | 118.6, CH             | 6.97, d (8.4)                 |
|          | 6/8                 | 114.5, CH             | 6.65, d (7.9)                       |            | 7                   | 125.6, C              | -                             |
|          | 7                   | 156.7, C              | -                                   |            | 8                   | 110.8, CH             | 7.34, s                       |
|          | 2-NH                | -                     | 8.52, br s                          |            | 8a                  | 136.5, C              | -                             |
| Ser-3    | 1                   | 169.1, C              | -                                   |            | 9                   | 125.0, CH             | 7.19                          |
|          | 2                   | 52.0, CH              | 4.58                                |            | 2-NH                | -                     | 7.64                          |
|          | 3                   | 64.0, CH <sub>2</sub> | 4.34, d (9.9); 4.40                 |            | 9-NH                | -                     | 11.0, s                       |
|          | 2-NH                | -                     | 8.23, d (6.6)                       | Val-9      | 1                   | 170.2, C              | -                             |
| Glu-4    | 1                   | 171.5, C              | -                                   |            | 2                   | 57.6, CH              | 4.05                          |
|          | 2                   | 52.5, CH              | 4.47                                |            | 3                   | 30.3, CH              | 1.66, m                       |
|          | 3                   | 27.1, CH <sub>2</sub> | 1.81, m; 2.02, m                    |            | 4                   | 18.8, CH <sub>3</sub> | 0.39, d (6.5)                 |
|          | 4                   | 30.6, CH <sub>2</sub> | 2.14, 2.23                          |            | 5                   | 17.8, CH <sub>3</sub> | 0.47, d (5.9)                 |
|          | 5-COOH              | 174.5, C              | -                                   |            | NH                  | -                     | 7.70, br s                    |
|          | 2-NH                | -                     | 8.13, br s                          | Phe-10     | 1                   | 170.6, C              | -                             |
| Thr-5    | 1                   | 170.4, C              | -                                   |            | 2                   | 51.1, CH              | 4.74, br s                    |
|          | 2                   | 57.9, CH              | 4.43                                |            | 3                   | 36.5, CH <sub>2</sub> | 2.76; 2.98, d (11.8)          |
|          | 3                   | 66.7, CH              | 4.05                                |            | 4                   | 137.5, C              | -                             |
|          | 4                   | 19.6, CH <sub>3</sub> | 1.01, d (6.1)                       |            | 5/9                 | 129.4, CH             | 7.31, d (7.7)                 |
|          | 2-NH                | -                     | 7.67                                |            | 6/8                 | 128.0, CH             | 7.23                          |
| Ser-6    | 1                   | 170.8, C              | -                                   |            | 7                   | 126.3, CH             | 7.16                          |
|          | 2                   | 54.7, CH              | 4.46                                |            | NH                  | -                     | 8.37                          |
|          | 3                   | 61.5, CH <sub>2</sub> | 3.51, br s;<br>3.69, dd (10.1, 5.7) | MehyPro-11 | 1                   | 169.5, C              | -                             |
| MeAsn-7  | 2-NH                | -                     | 8.36                                |            | 2                   | 62.3, CH              | 4.37, d (7.8)                 |
|          | 1                   | 169.6, C              | -                                   |            | 3                   | 74.9, CH              | 4.21, br s                    |
|          | 2                   | 55.2, CH              | 4.47                                |            | 4                   | 37.5, CH              | 2.21                          |
|          | 3                   | 40.1, CH              | 2.68, m                             |            | 5                   | 50.6, CH <sub>2</sub> | 3.20, 3.81, br s              |
|          | 4                   | 11.8, CH <sub>3</sub> | 0.66, br s                          |            | 6                   | 14.3, CH <sub>3</sub> | 1.04, d (6.1)                 |
|          | 5-CONH <sub>2</sub> | 175.0, C              | -                                   |            |                     |                       |                               |

\* The assignments of overlapping  $^1\text{H}$  NMR signals were supported by HSQC, HMBC, TOCSY and HSQC-TOCSY. The peak multiplicity and coupling constants are presented for non-overlapping signals only.

## CONKAT-seq workflow

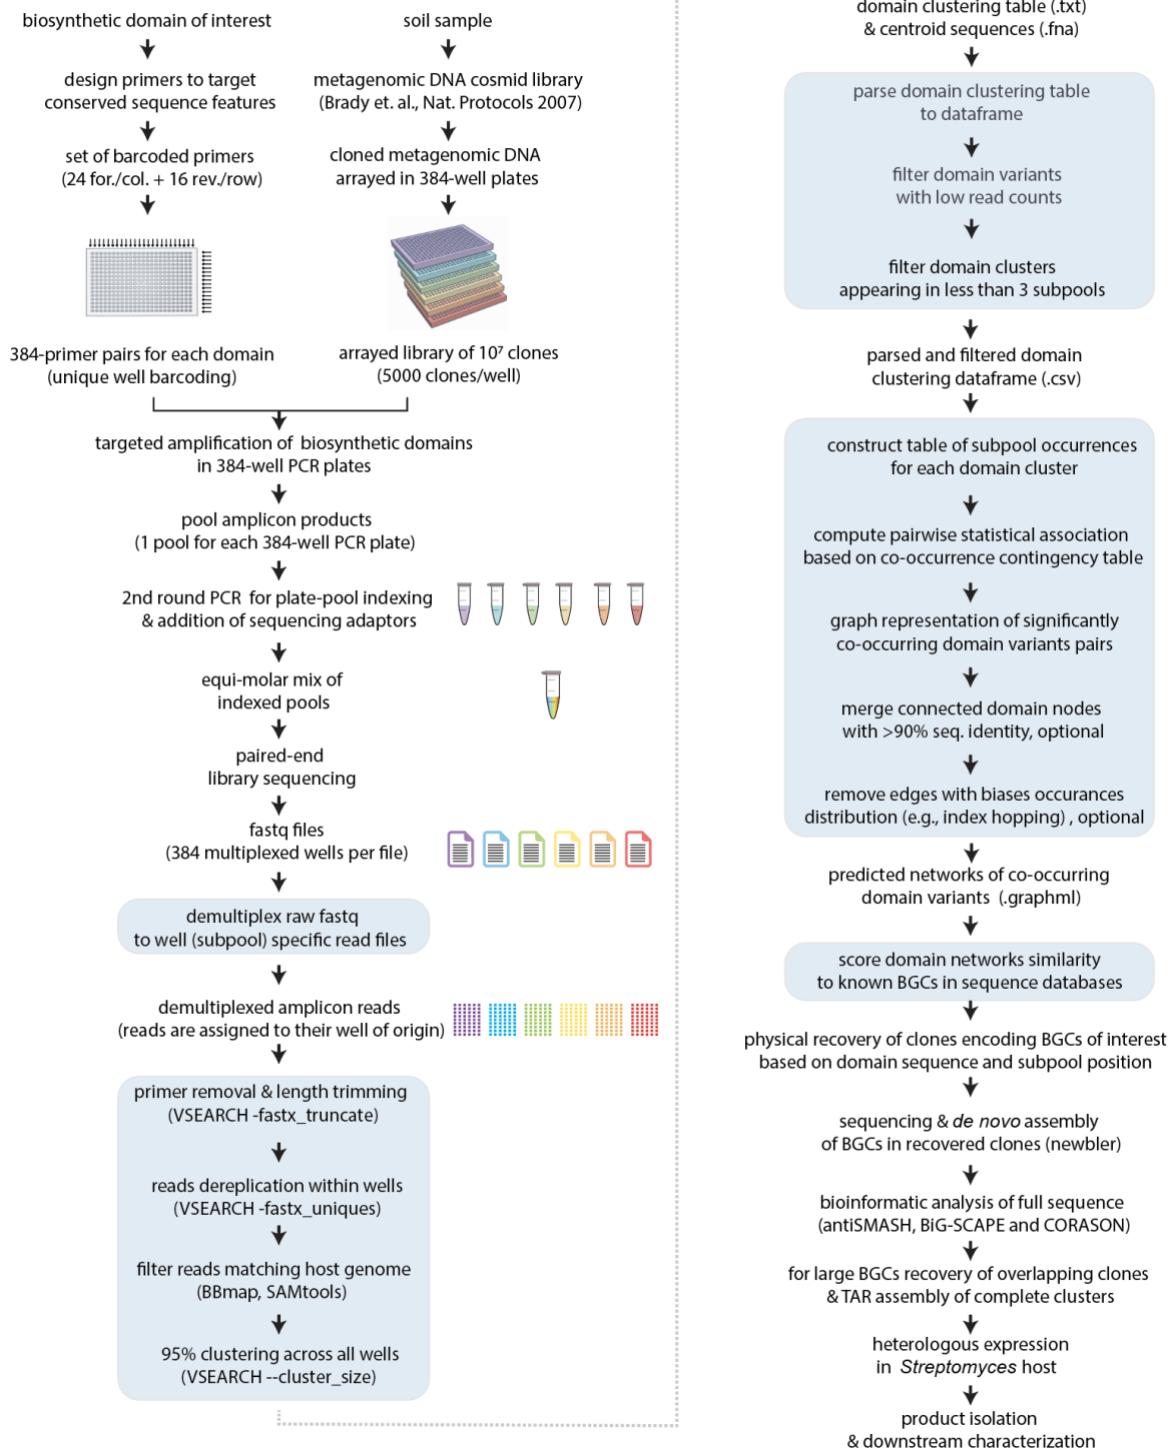

**Supplementary Fig. 1 - CONKAT-seq workflow.** CONKAT is based on the statistical analysis of amplicon co-occurrence in a partitioned library of large insert metagenomic clones. High molecular weight DNA from soil samples are extracted and cloned to construct large insert metagenomic library which preserves the linkage between co-clustered genes. Library clones are randomly partitioned into hundreds of wells (subpools), and DNA sequence encoding for biosynthetic domains of interest are amplified using barcoded primers. Amplicon de-barcoding identifies the positioning of each biosynthetic domain within the array of subpools and enables the statistical analysis of domain co-occurrence. Domains encoded within a BGC are expected to show high level of co-occurrence across subpools due to their physical linkage. Significantly associated domains are grouped into networks, that can be guide the recovery of novel BGCs based on their similarity scores to known BGCs. The domain variant sequences and the subpool localization information that are associated with networks of interest can guide the physical recovery of metagenomic clones encoding for novel BGCs from the library using serial dilution PCR strategy with domain variant specific primers. Isolated metagenomic clones can be sequenced and assembled to obtain the full BGC sequence encoded within the clone, or heterologously expressed in a suitable host to attempt and obtain the molecular product. Scripts for domain clustering prediction from amplicon data (highlighted in blue) are available at [https://github.com/brady-lab-rockefeller/conkat\\_seq](https://github.com/brady-lab-rockefeller/conkat_seq).

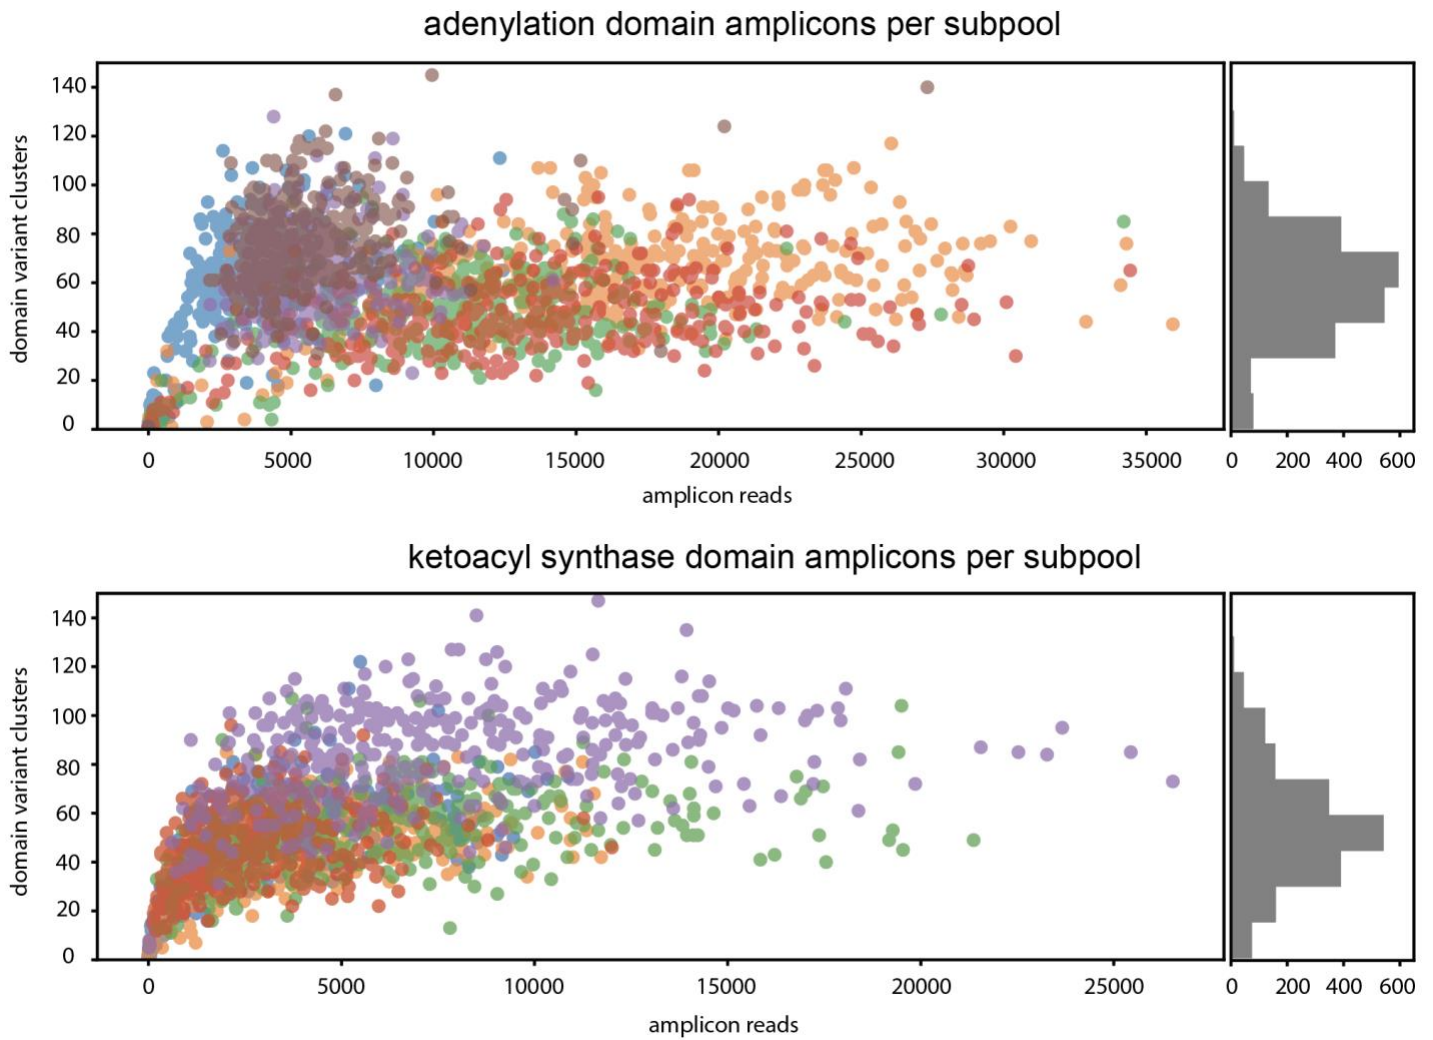

**Supplementary Fig. 2 - Adenylation and ketoacyl-synthase domain variants in the Arizona library subpools.** Scatter plot of amplicons reads and domain variant clusters (95% identity threshold) in subpools of the Arizona metagenomic library. Each subpool (containing ~5000 metagenomic clones) was PCR amplified using adenylation and ketoacyl-synthase subpool-barcoed domain primers. Approximately 3000 reads per subpool were required to saturate the diversity of domain variants amplified by these primers in each subpool. On average, we identified 60 adenylation domain variants and 55 ketoacyl-synthase domain variants per subpool and a total of  $10^5$  unique domain variants across the library. Colors represent 384-subpools PCR reaction plates that have been pooled and sequenced as an indexed sample.

# Arizona

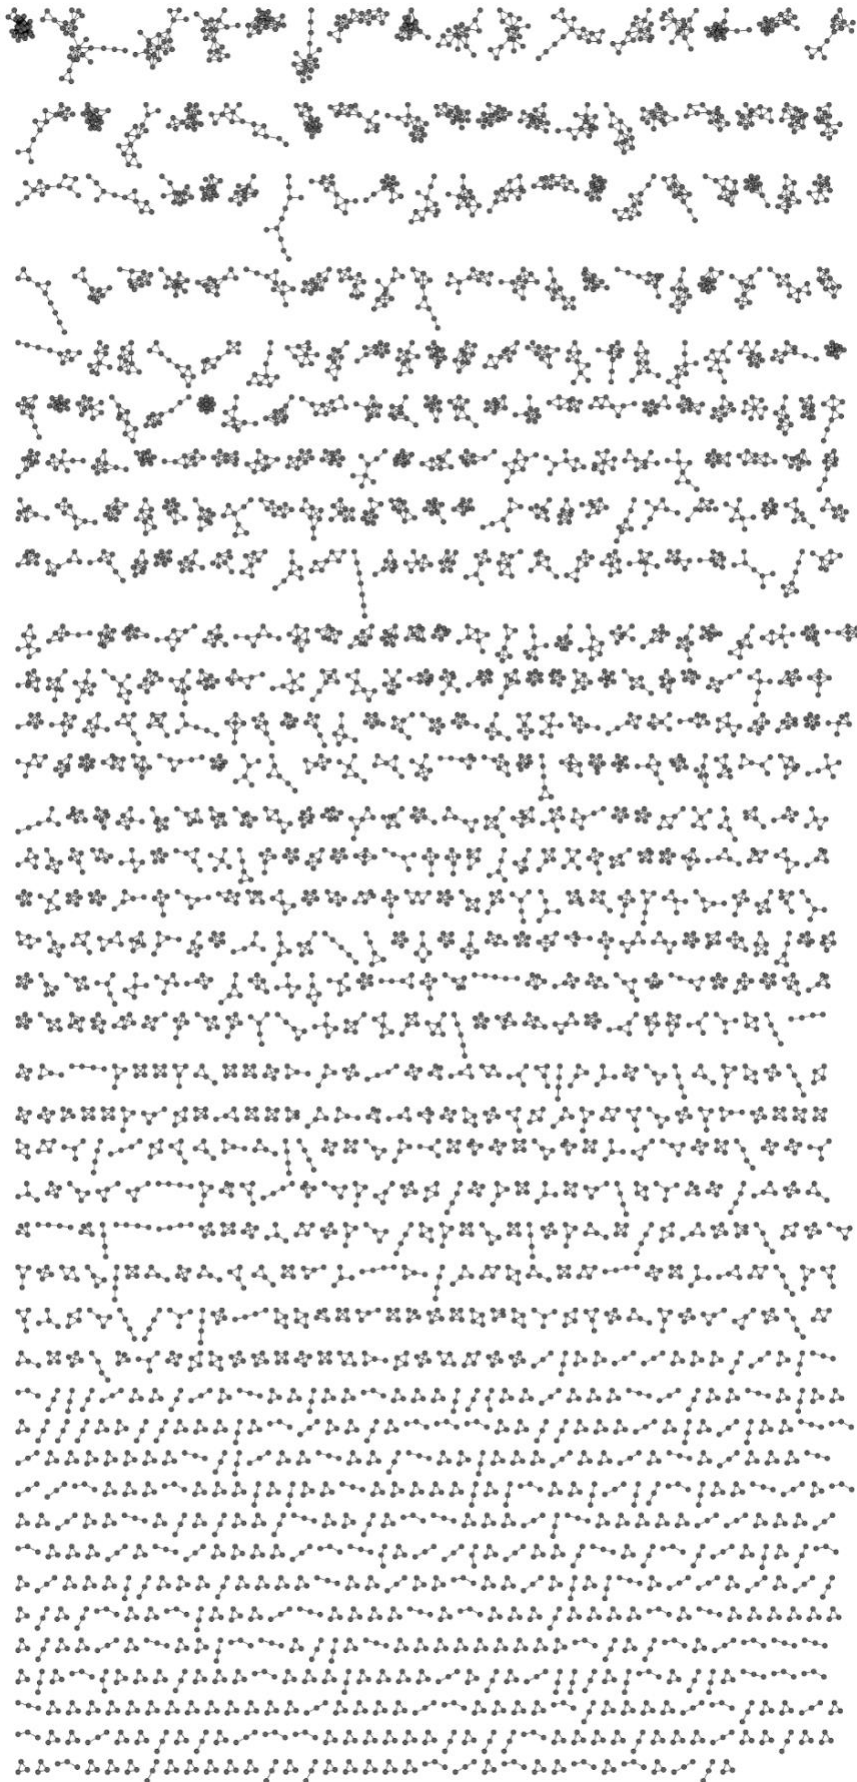

1233 networks

**Supplementary Fig. 3 - Predicted domain networks (Arizona)**



### Recovered single clones

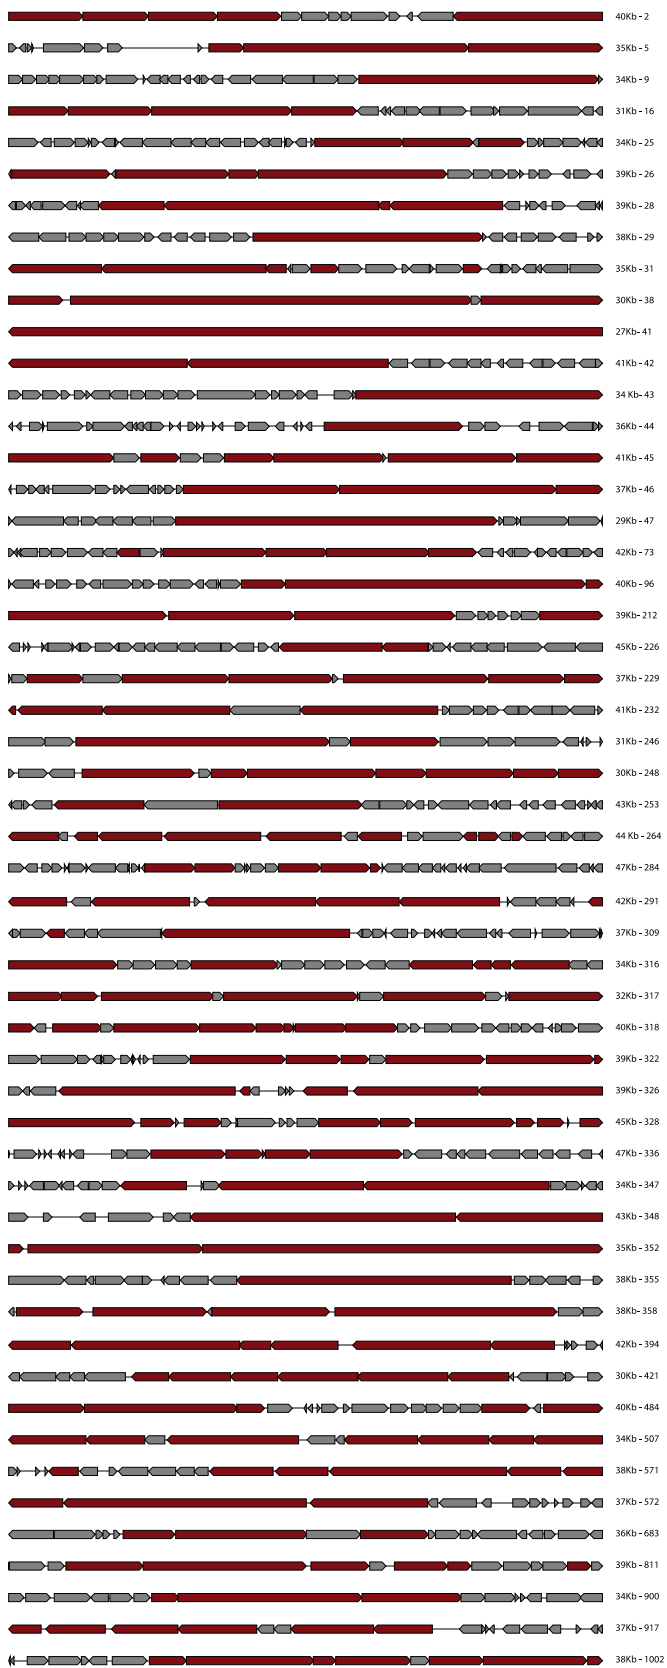

### PACBIO contigs

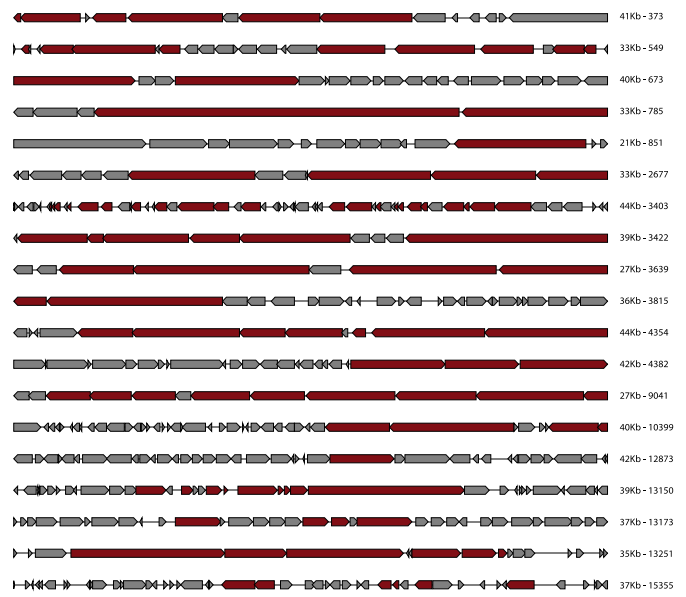

### Recovered multiple overlapping clones

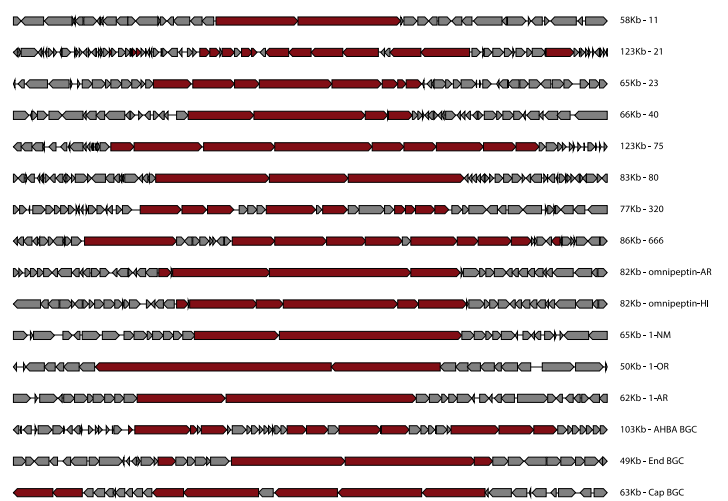

**Supplementary Fig. 4 - NRPS and PKS genes locations in metagenomic insert sequences.** NRPS and PKS genes are depicted in red. Recovered clones have been sequenced individually with short-read technology (Illumina) while PacBio contigs have been obtained from bulk sequencing of 2 subpools of ~5000 clones each with long-read technology.

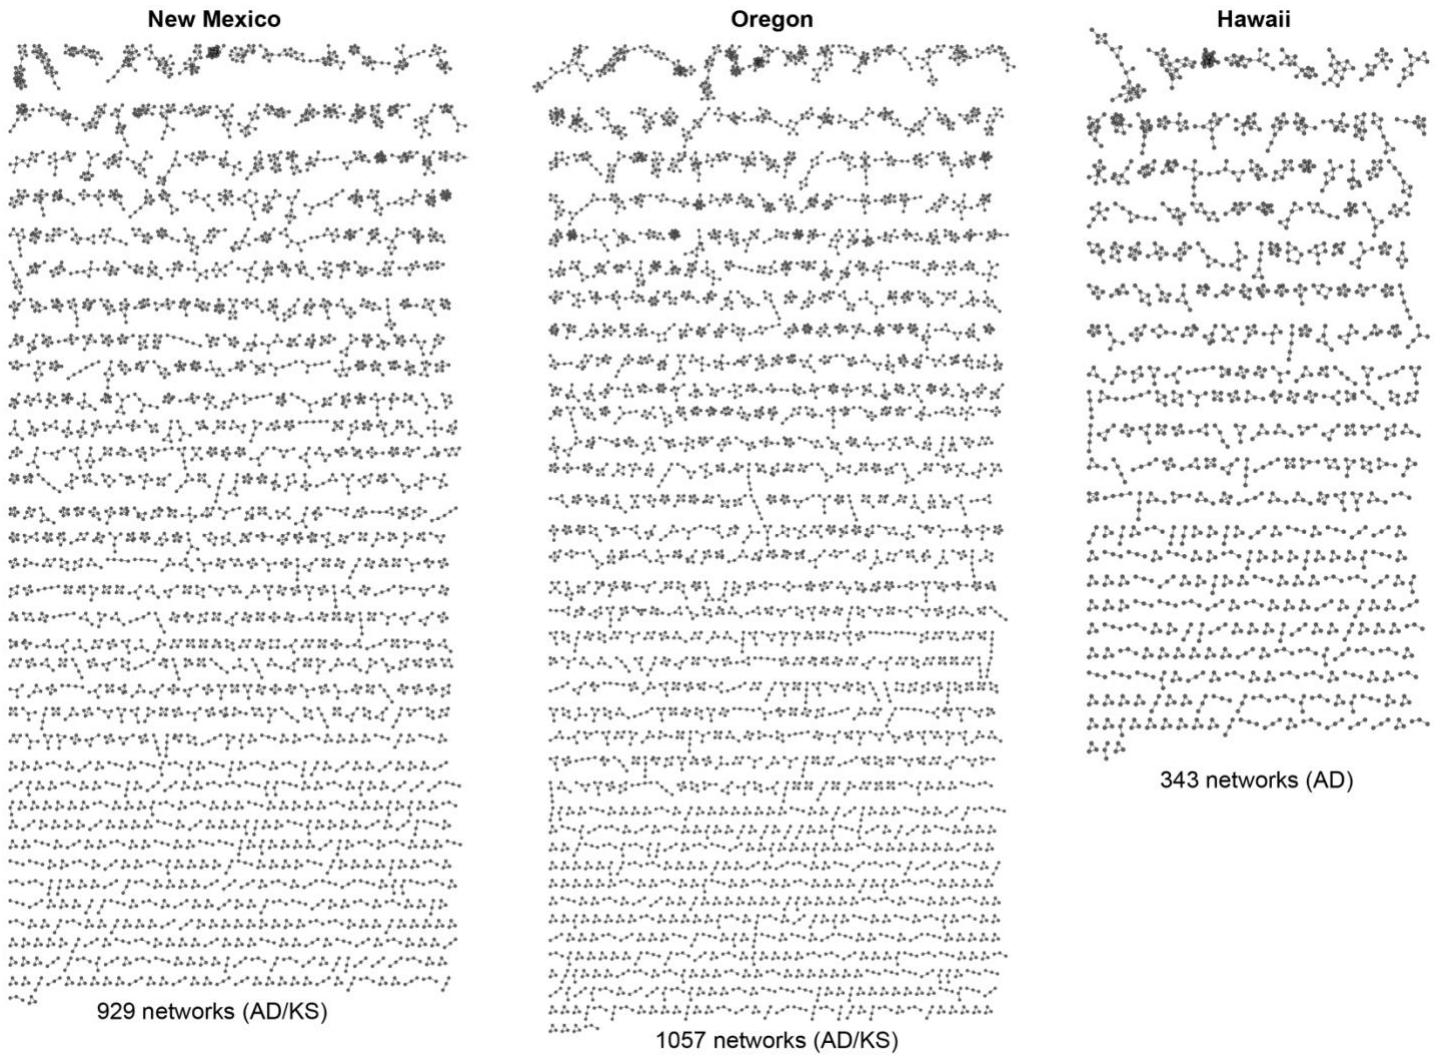

**Supplementary Fig. 5 - Predicted domain networks (Oregon, New Mexico, Hawaii)**

isoAsp-hyTyr-Ser-D-Glu-Thr-Ser-MeAsn-CITrp-D-Val-Phe-MehyPro

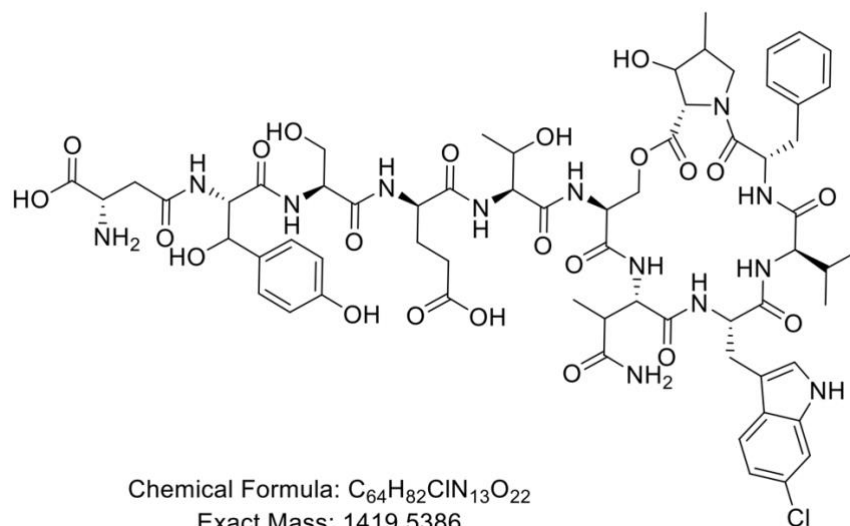

\*The stereochemistry of  $\alpha$ -protons in amino acid residues were predicted by bioinformatics analysis.

**Supplementary Fig. 6 - Chemical structure of omnipeptin (1)**

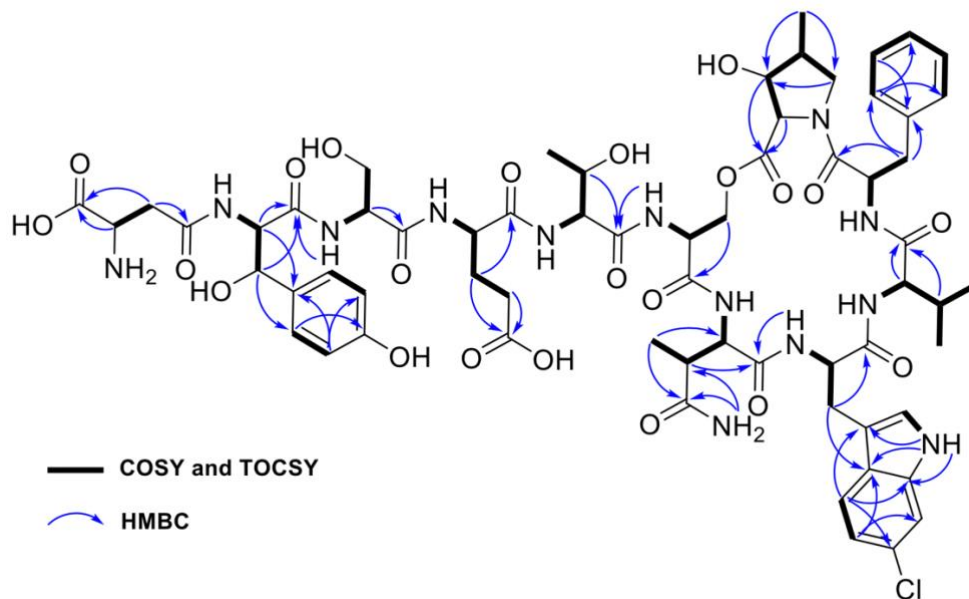

**Supplementary Fig. 7 - 2D NMR correlations of omniipeptin (1)**

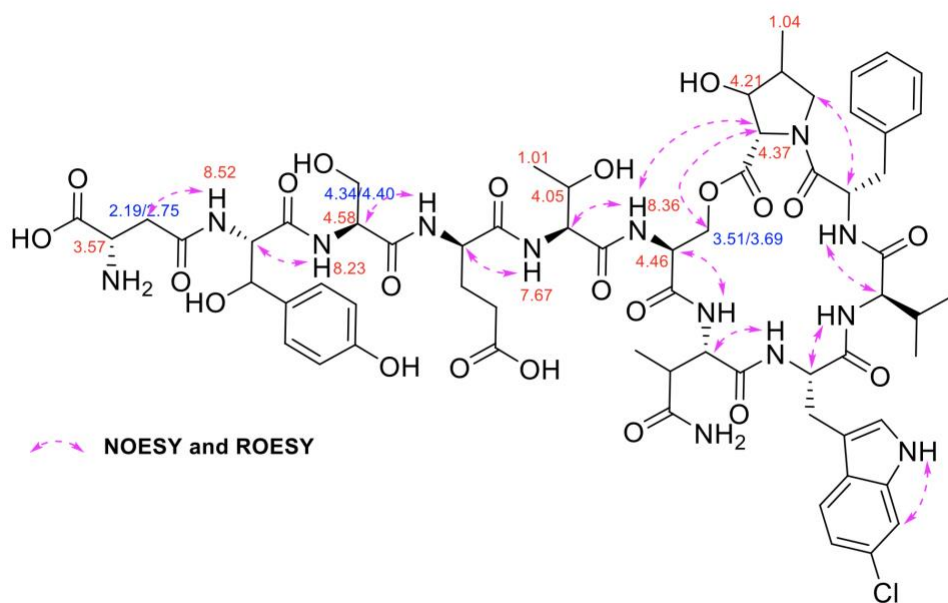

**Supplementary Fig. 8** - NOE/ROE correlations of omnipeptin (1) establishing the connectivity of amino acid residues

302-1 NMR  
1H NMR spectrum of 302-1 in DMSO-d6

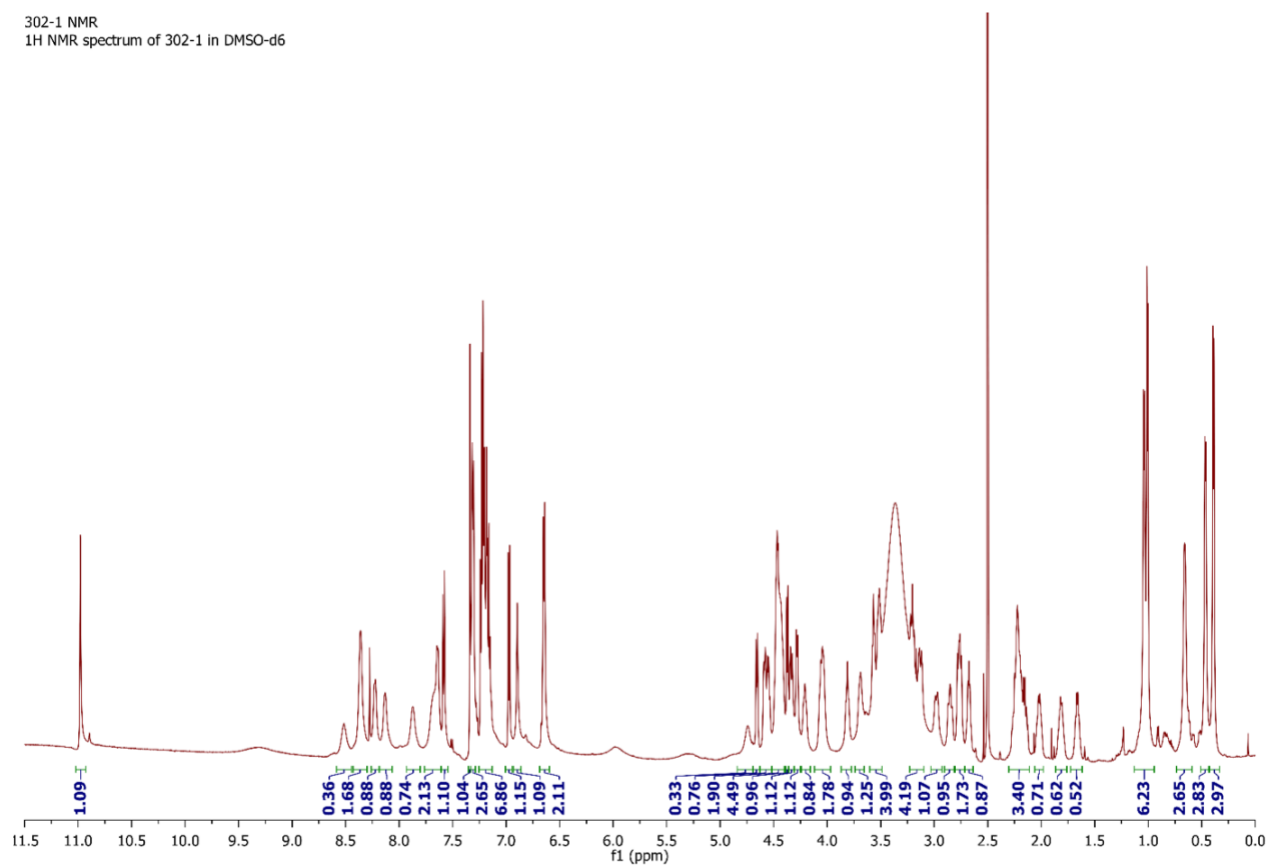

**Supplementary Fig. 9** -  $^1\text{H}$  NMR (600 MHz,  $\text{DMSO-d}_6$ ) spectrum of omnipeptin (**1**)

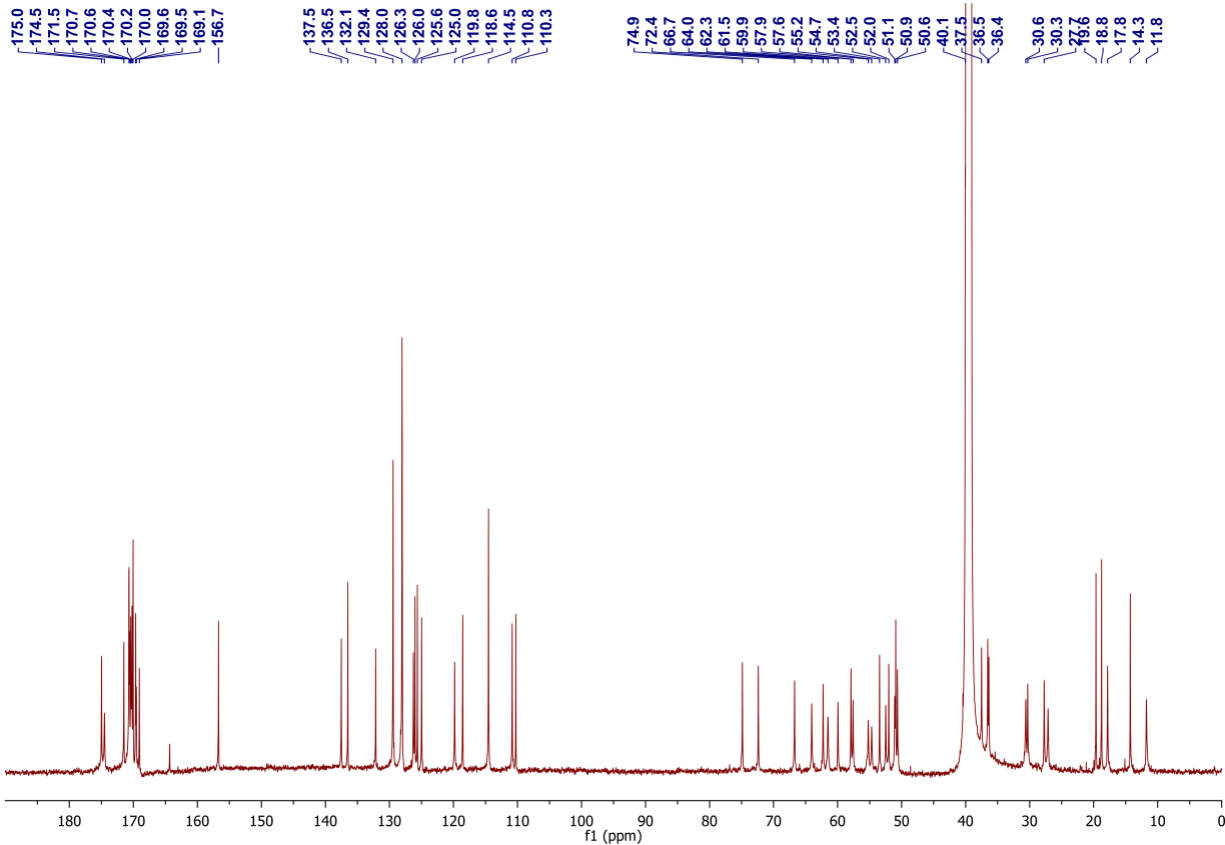

**Supplementary Fig. 10** -  $^{13}\text{C}$  NMR (150 MHz,  $\text{DMSO-}d_6$ ) spectrum of omnipeptin (1)

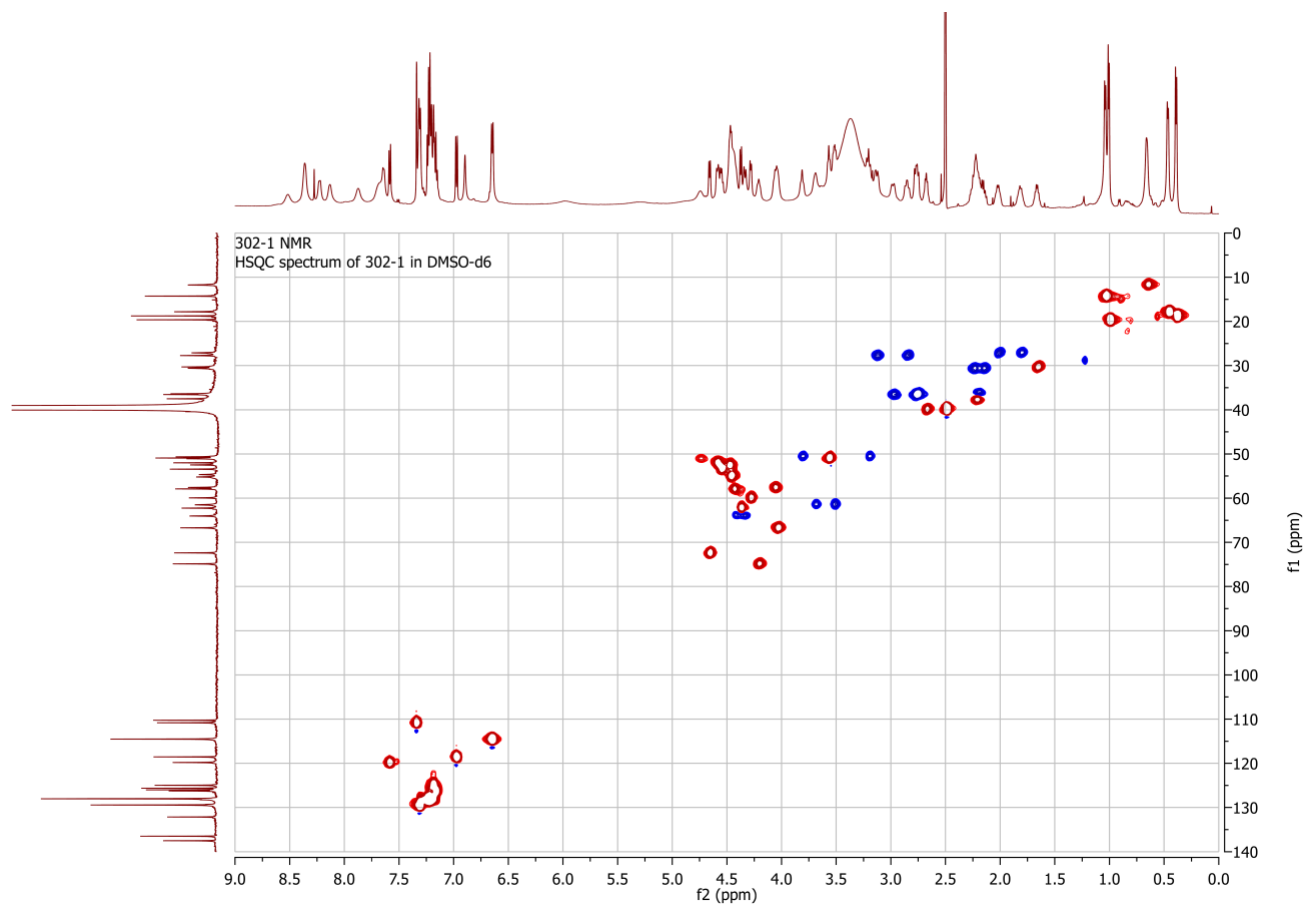

Supplementary Fig. 11 -  $^1\text{H}$ - $^{13}\text{C}$  HSQC NMR (600 MHz,  $\text{DMSO-d}_6$ ) spectrum of omnipeptin (1)



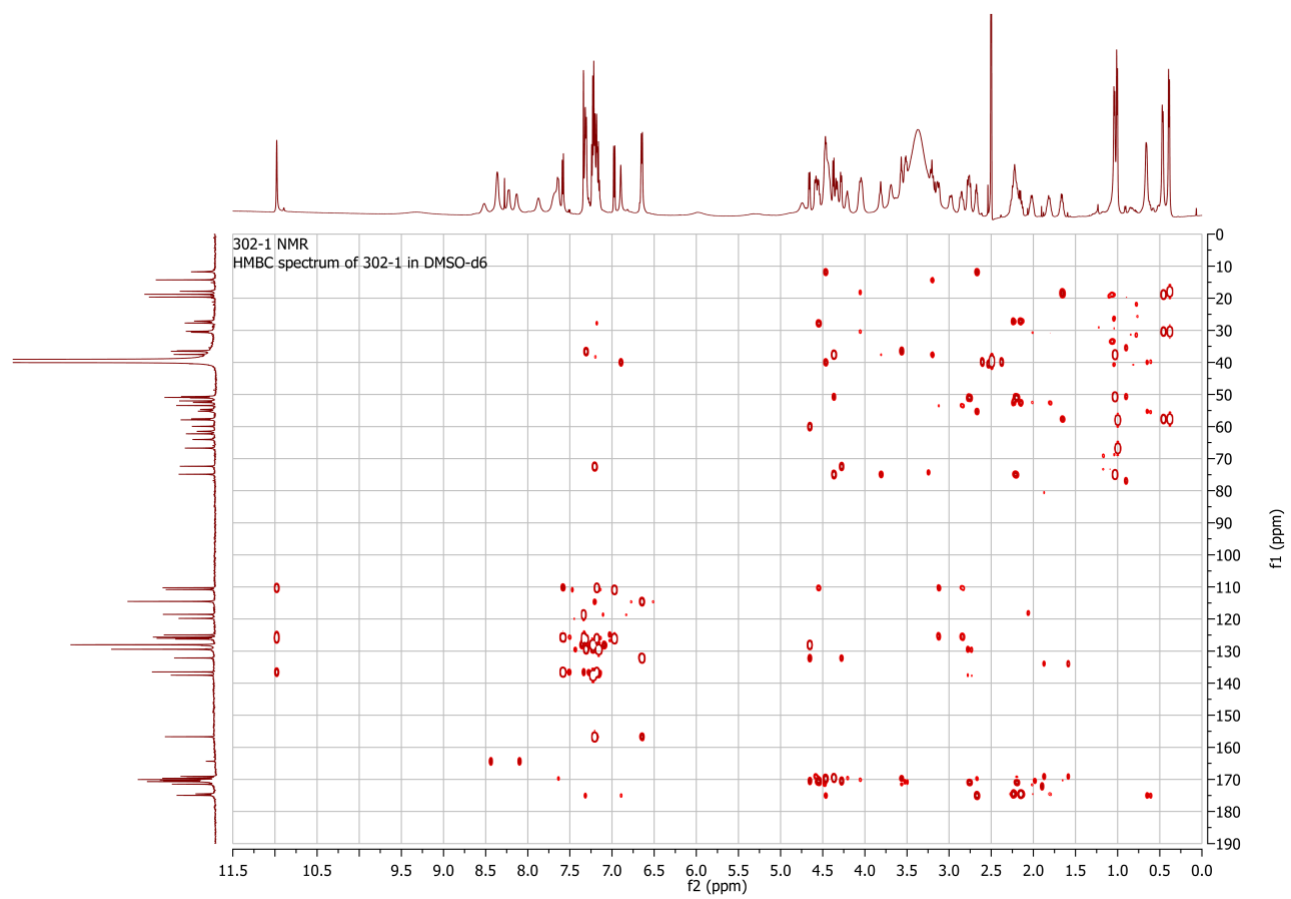

**Supplementary Fig. 12** -  $^1\text{H}$ - $^{13}\text{C}$  HMBC NMR (600 MHz,  $\text{DMSO-d}_6$ ) spectrum of omnipeptin (1)

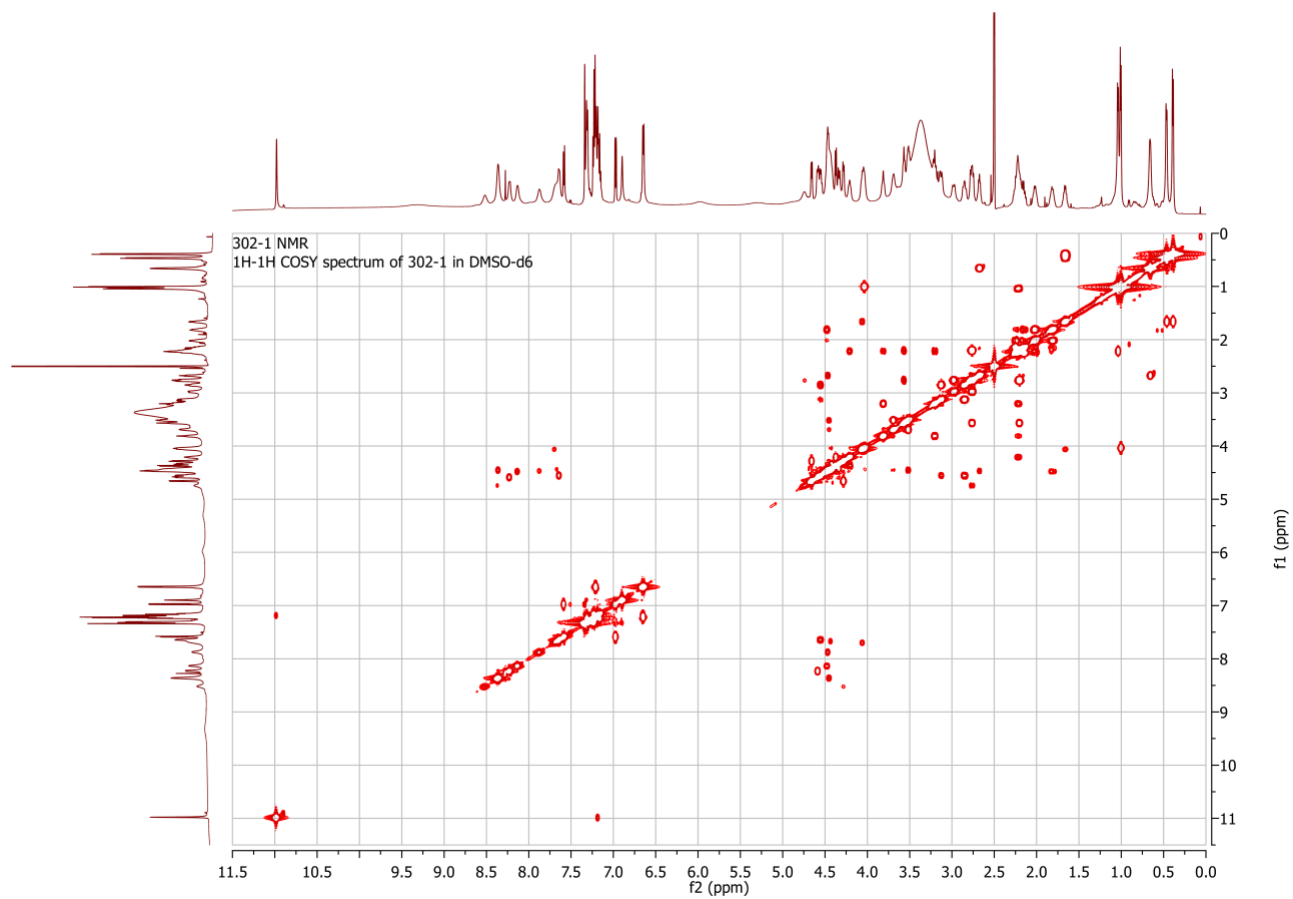

**Supplementary Fig. 13** -  $^1\text{H}$ - $^1\text{H}$  COSY NMR (600 MHz, DMSO- $d_6$ ) spectrum of omnipeptin (**1**)

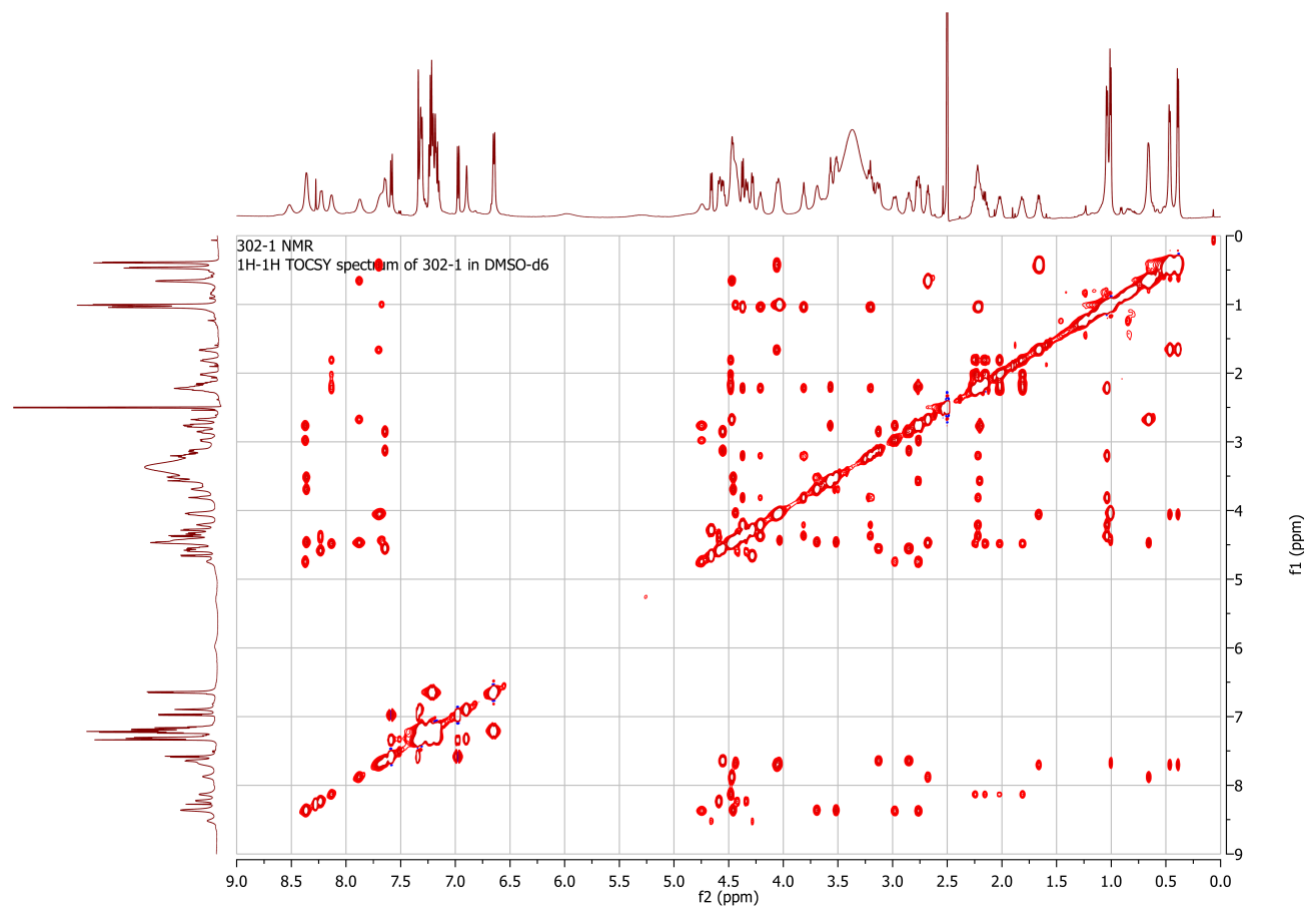

**Supplementary Fig. 14** -  $^1\text{H}$ - $^1\text{H}$  TOCSY NMR (600 MHz,  $\text{DMSO-d}_6$ ) spectrum of omnipeptin (**1**)

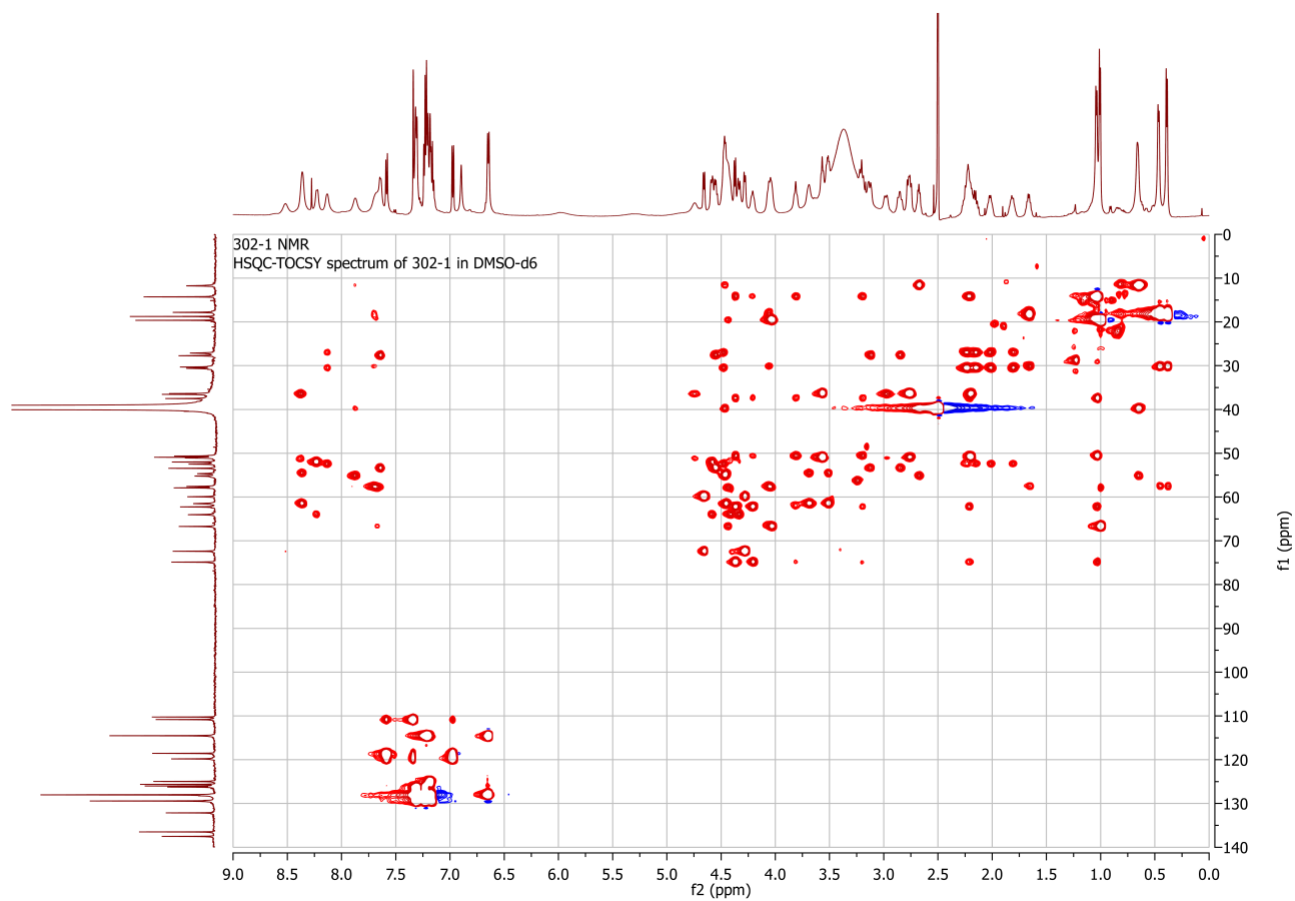

**Supplementary Fig. 15** -  $^1\text{H}$ - $^{13}\text{C}$  HSQC-TOCSY NMR (600 MHz, DMSO- $d_6$ ) spectrum of omnipeptin (**1**)

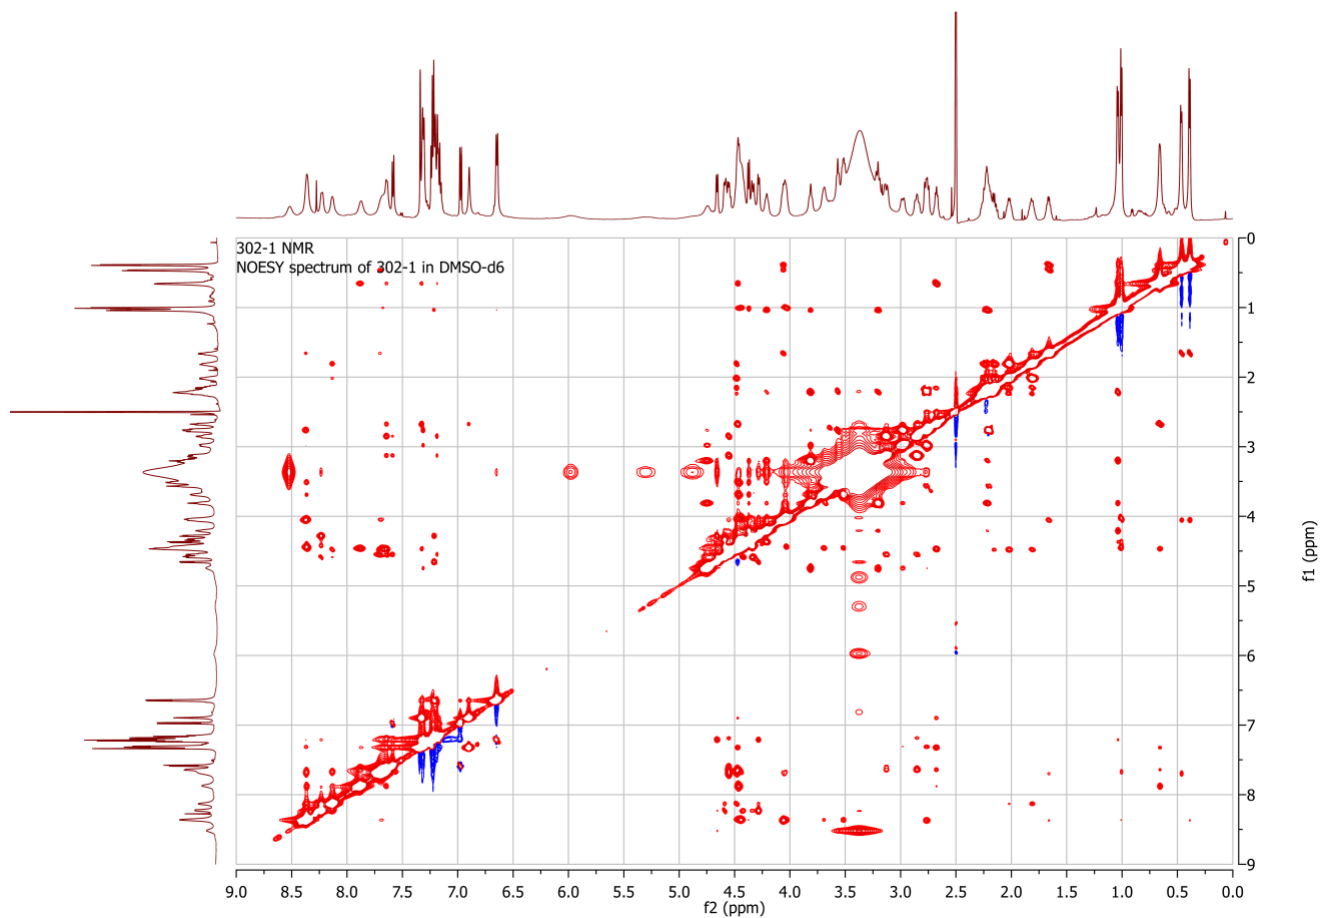

**Supplementary Fig. 16** -  $^1\text{H}$ - $^1\text{H}$  NOESY NMR (600 MHz, DMSO- $d_6$ ) spectrum of omnipeptin (**1**)

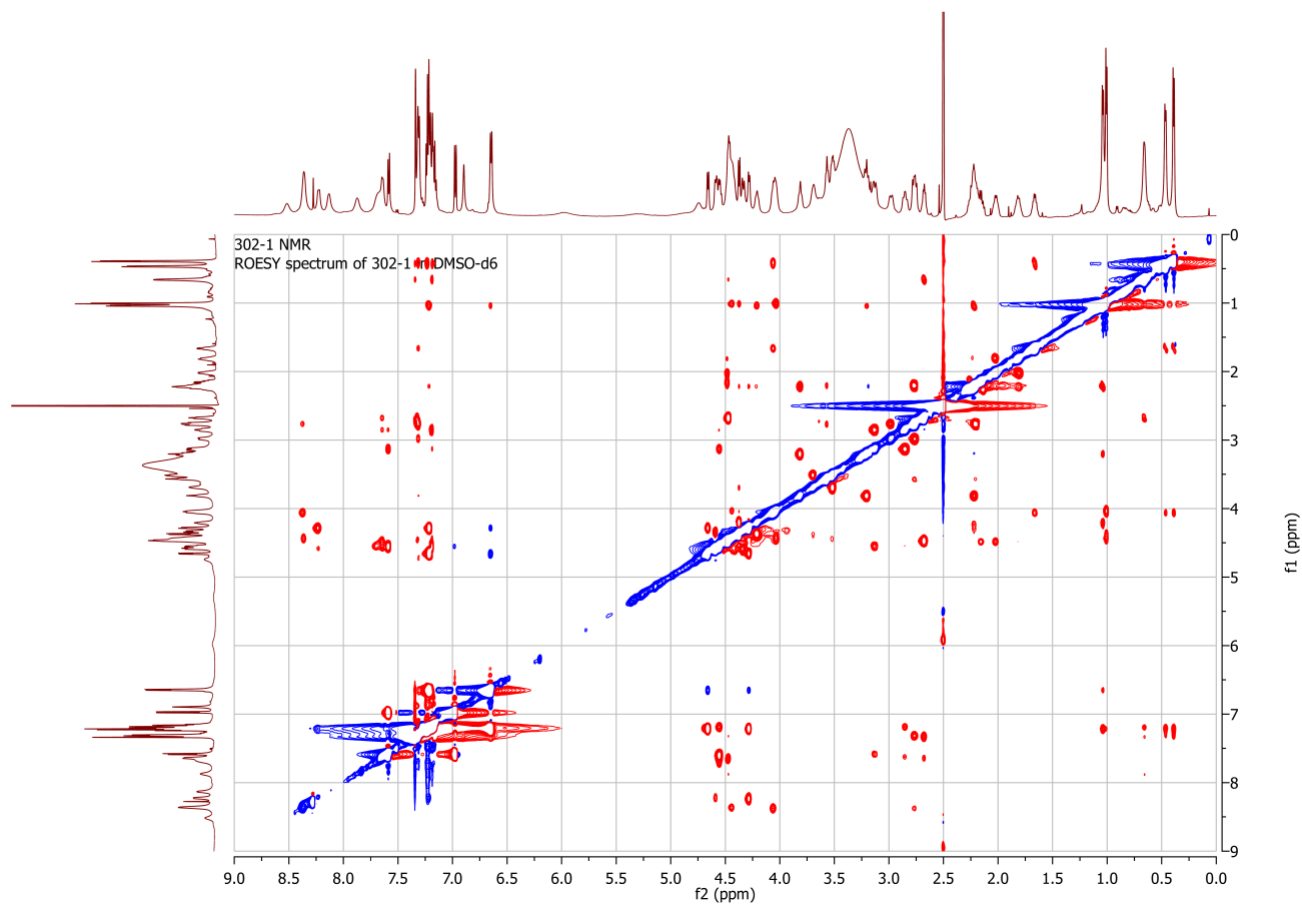

**Supplementary Fig. 17** -  $^1\text{H}$ - $^1\text{H}$  ROESY NMR (600 MHz,  $\text{DMSO-d}_6$ ) spectrum of omnipeptin (**1**)

F: FTMS + p ESI Full ms [300.00-1800.00]

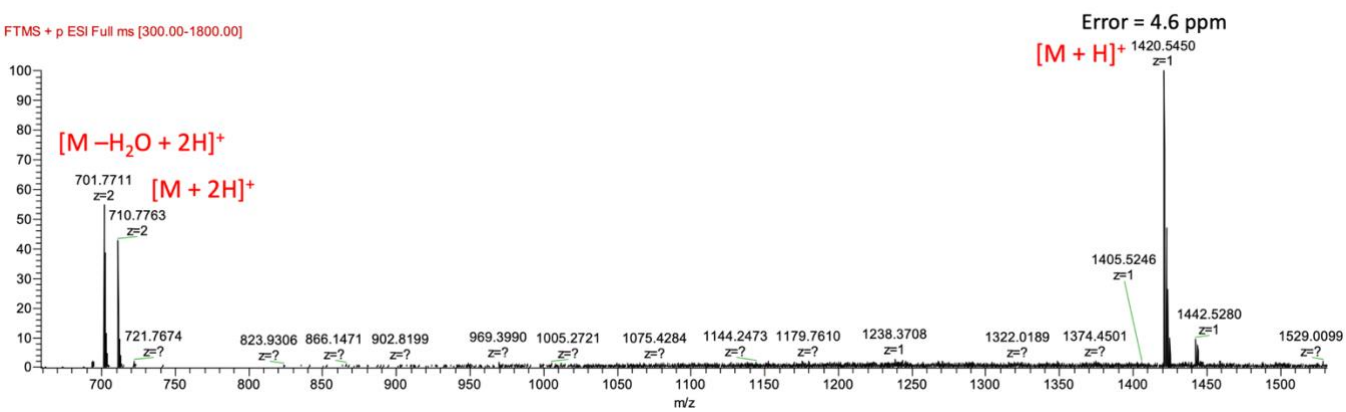

Supplementary Fig. 18 - High-resolution mass spectrometry spectrum of omnipeptin

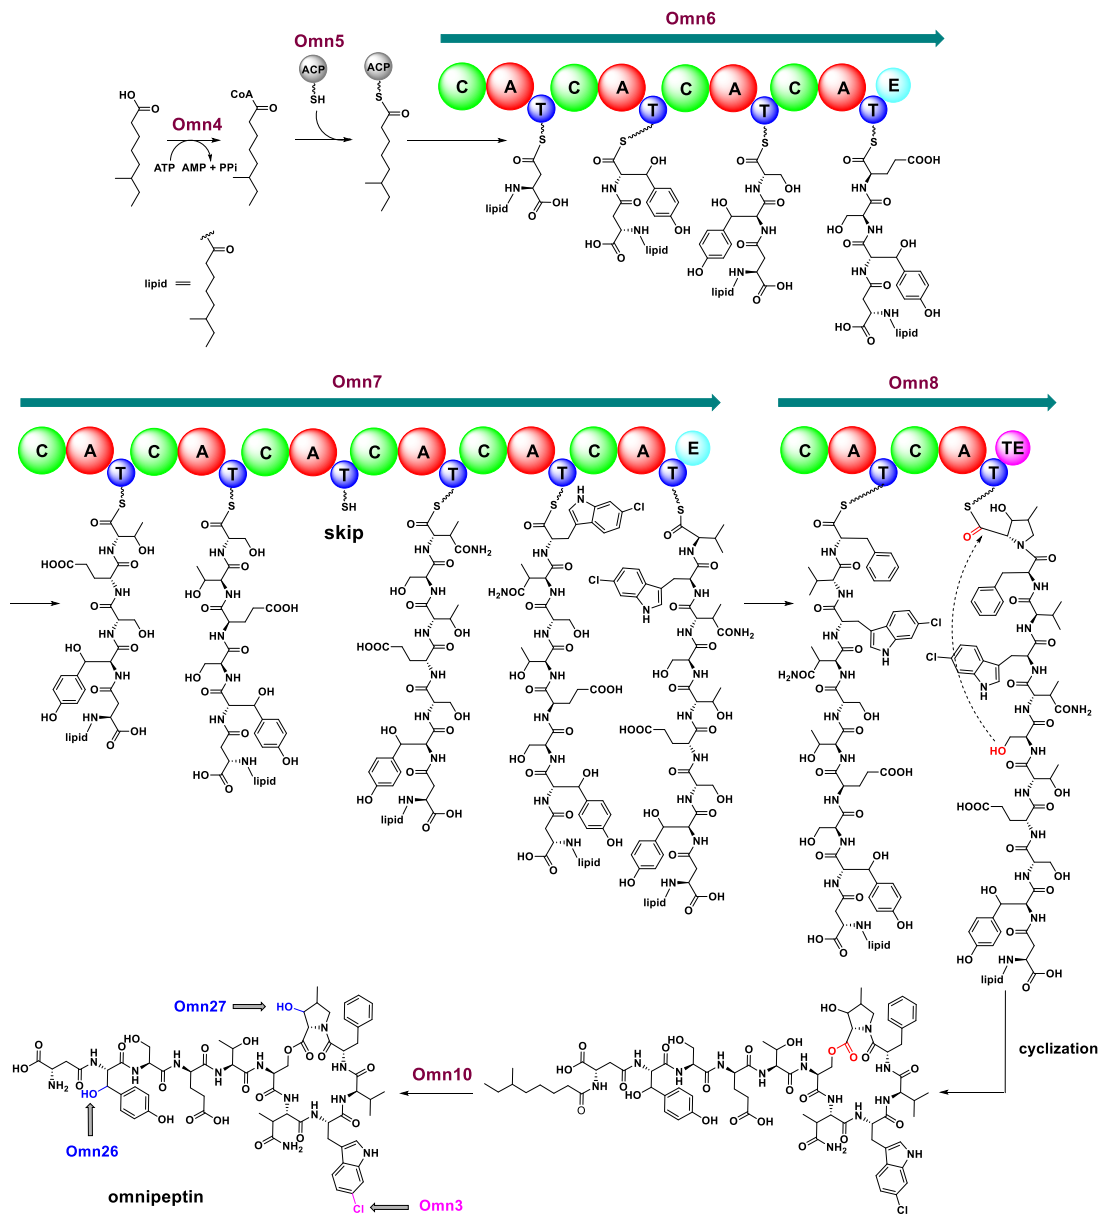

Supplementary Fig. 19 - Proposed biosynthesis of omnipeptin
