# Supplementary material for: Uncovering the biosynthetic potential of rare metagenomic DNA using co-occurrence network analysis of targeted sequences
Source: PubMed Central journal article supplement (PMC6710260; doi:10.1038/s41467-019-11658-z), 2019-08-26
Supplement: 41467_2019_11658_MOESM2_ESM.pdf [file 41467_2019_11658_MOESM2_ESM.pdf]

## **Description of Additional Supplementary Files**

File Name: Supplementary Data 1

Description: Validation of CONKAT-seq clustering predictions

File Name: Supplementary Data 2

Description: Full sequences of barcoded primers
